# Supplementary material for: Hedgehogs and Squirrels as Hosts of Zoonotic Bartonella Species
Source: MDPI journal article supplement (doi:10.3390/pathogens10060686), 2021-06-01

**Figure S1: Comparison of the portion of particular tissue samples with the lowest Cp value as assessed by real-time PCR in *Bartonella*-positive animals (verified by conventional PCRs)**

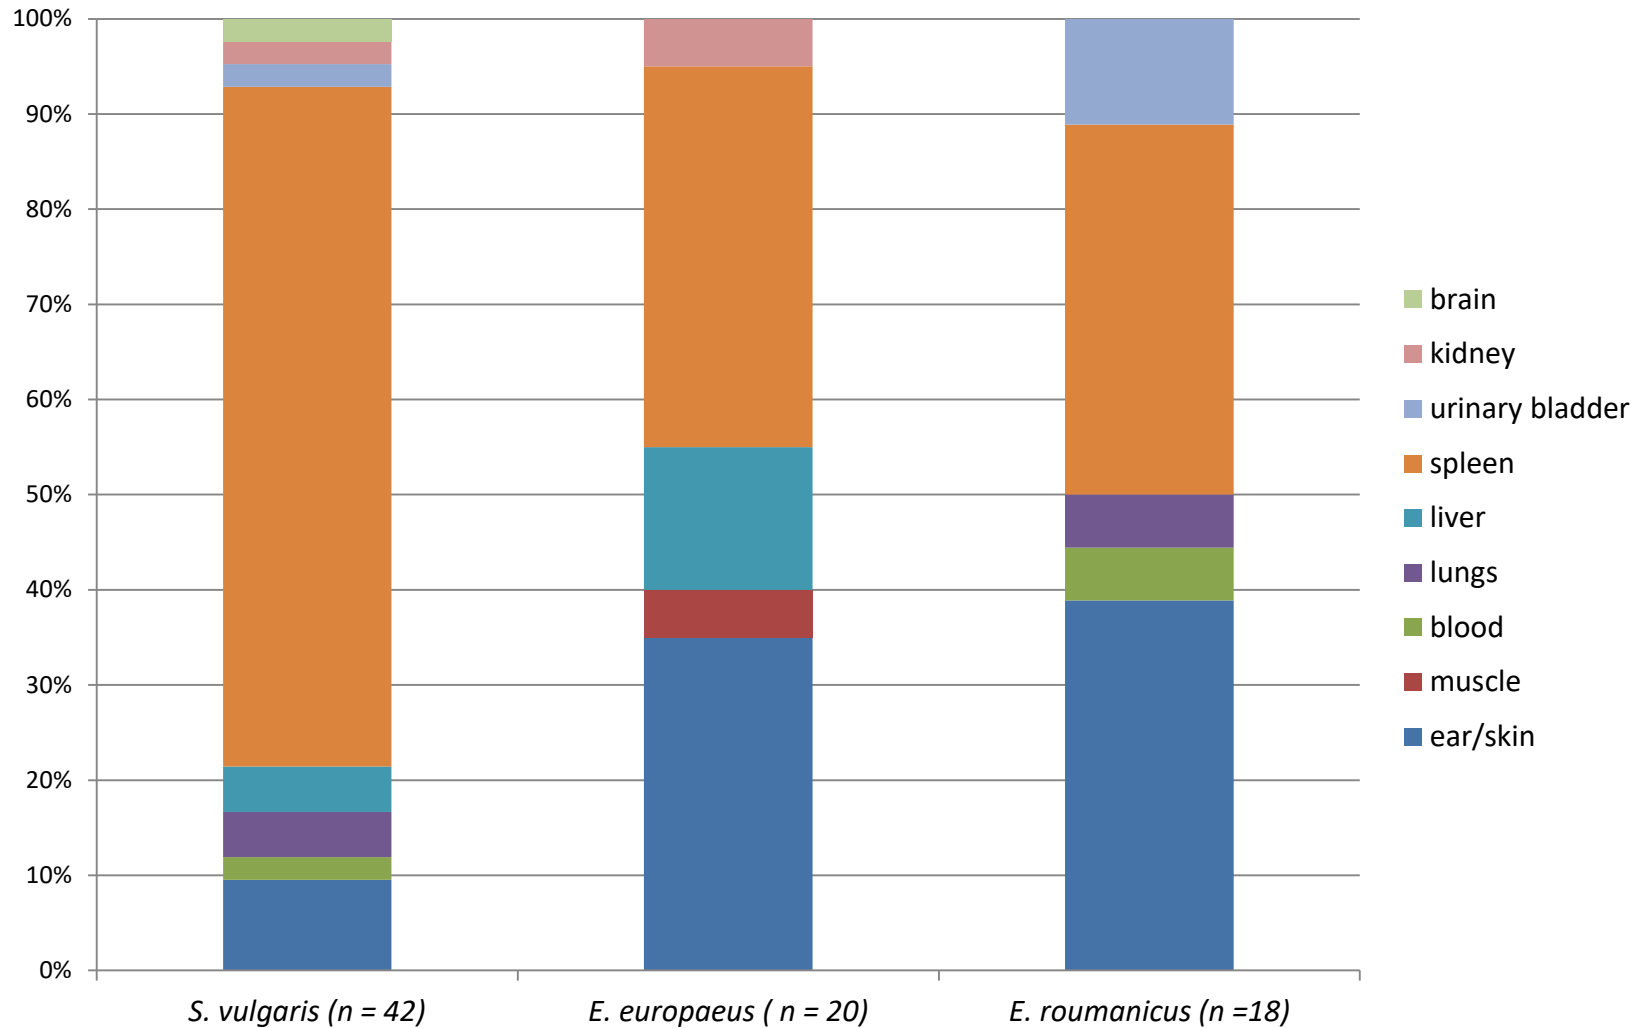

Supplement: s1 [file s1]
