# Supplementary figures and images for: Hedgehogs and Squirrels as Hosts of Zoonotic Bartonella Species
Source: MDPI journal article supplement (doi:10.3390/pathogens10060686), 2021-06-01

Figure S3A

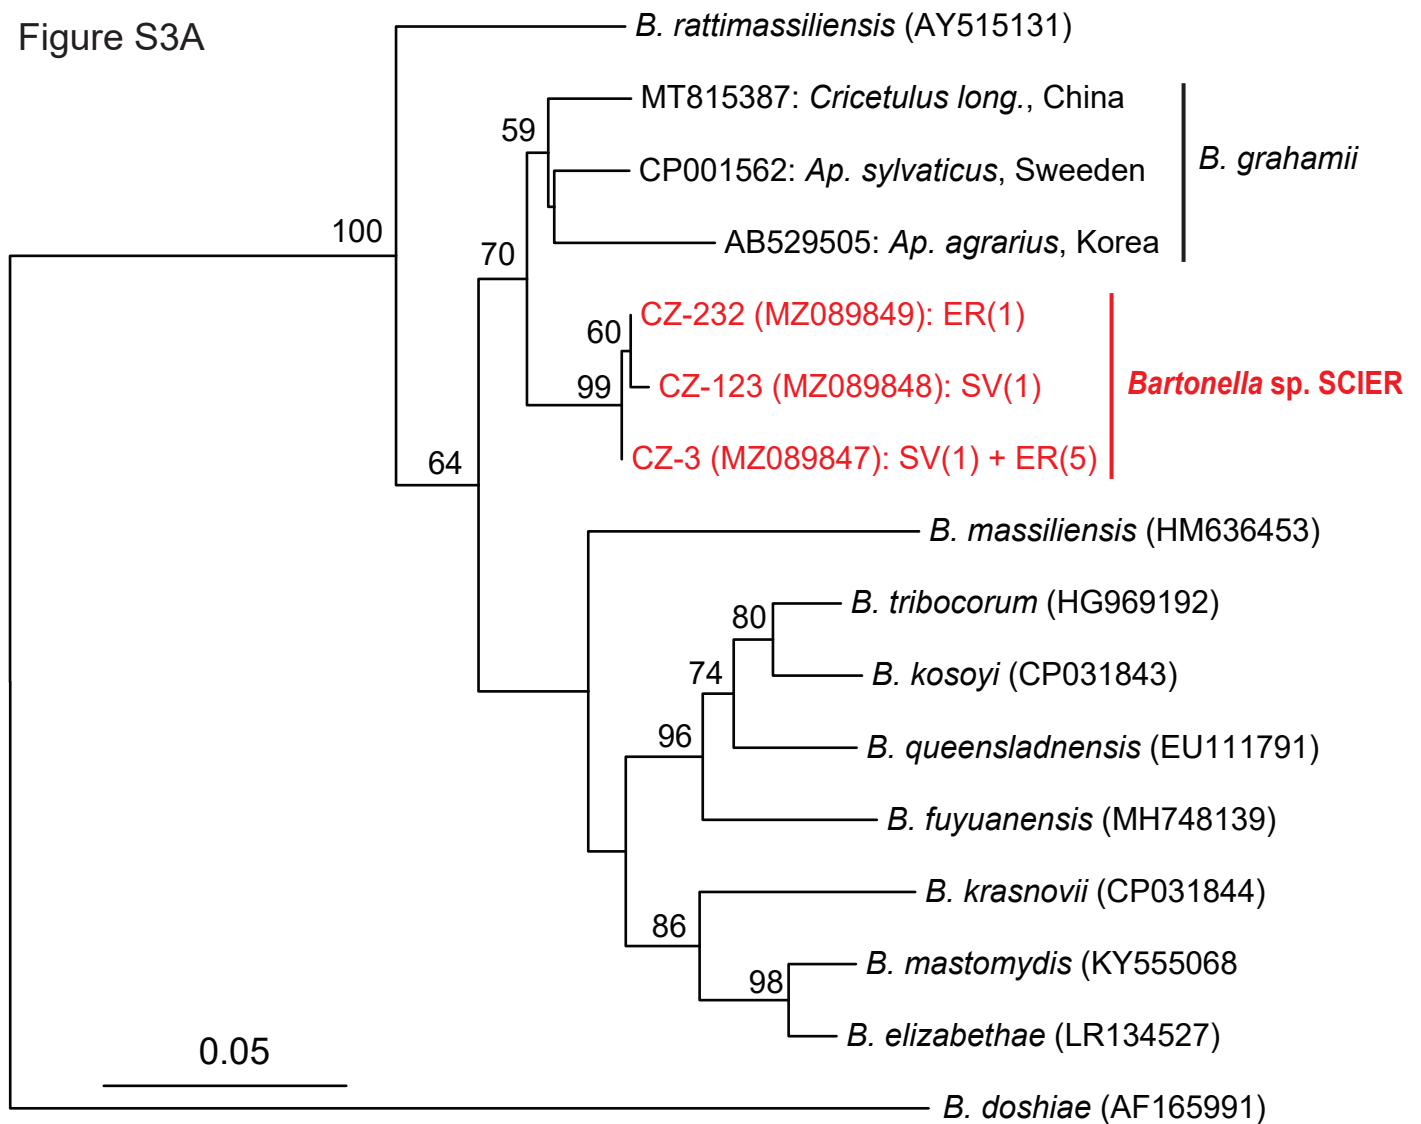

Figure S3B

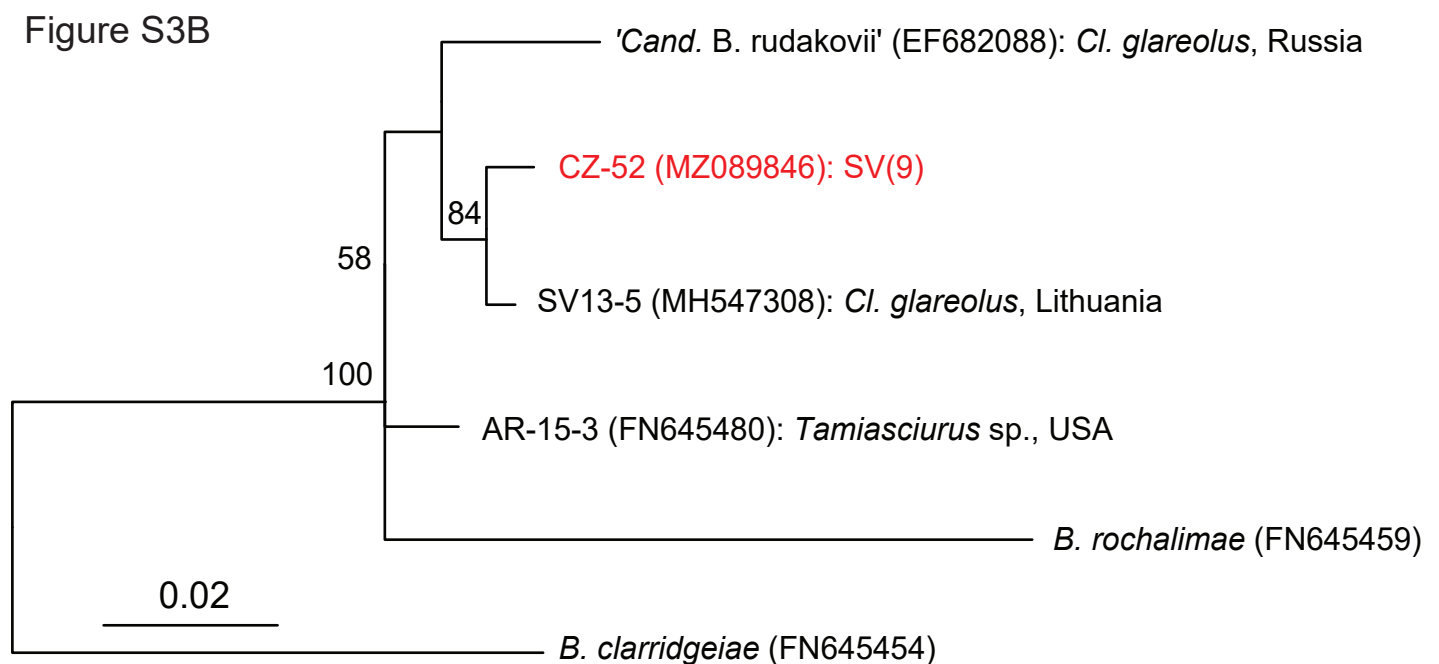

Supplement: s1 [file s1]
